# Supplementary material for: Chalcone-Synthase-Encoding RdCHS1 Is Involved in Flavonoid Biosynthesis in Rhododendron delavayi
Source: MDPI journal article supplement (doi:10.3390/molecules29081822), 2024-04-17
Supplement: s1 [file s1]

**Table S3 HPLC-DAD and HPLC-ESI-MS analysis of anthocyanin in acidic MeOH-H<sub>2</sub>O extracts of the wild-type *Arabidopsis* and *RdCHS1* over-expressing lines**

| Peak number | Identifacation/tentative identification                                                                                                                                                                       | Retention time (min) | $\lambda_{\text{max}}$ (nm) | ESI-MS (m/z)                                         | References                                          |
|-------------|---------------------------------------------------------------------------------------------------------------------------------------------------------------------------------------------------------------|----------------------|-----------------------------|------------------------------------------------------|-----------------------------------------------------|
| 1           | Cyanidin 3- <i>O</i> -[2''- <i>O</i> -(xylosyl) 6''- <i>O</i> -( <i>p</i> - <i>O</i> -(glucosyl) <i>p</i> -coumaroyl) glucoside] 5- <i>O</i> -[6'''- <i>O</i> -(malonyl) glucoside]                           | 45.565               | 266<br>526                  | 287.1[Cy+H] <sup>+</sup><br>1137.4[M+H] <sup>+</sup> | Takayuki Tohge, Yasutaka Nishiyama et al., 2005 [1] |
| 2           | Cyanidin 3- <i>O</i> -[2''- <i>O</i> -(6'''- <i>O</i> -(sinapoyl) xylosyl) 6''- <i>O</i> -( <i>p</i> - <i>O</i> -(glucosyl)- <i>p</i> -coumaroyl) glucoside] 5- <i>O</i> -(6'''- <i>O</i> -malonyl) glucoside | 47.720               | 294<br>534                  | 287.0[Cy+H] <sup>+</sup><br>1343.2[M+H] <sup>+</sup> | Stephen J. Bloora, Sharon Abrahamsb., 2002 [2]      |
| 3           | Pelargonidin derivatives                                                                                                                                                                                      | 56.831               | 282<br>527                  | 271.2[Pg+H] <sup>+</sup>                             |                                                     |
| 4           | Pelargonidin derivatives                                                                                                                                                                                      | 57.605               | 284<br>534                  | 271.3[Pg+H] <sup>+</sup>                             |                                                     |

Reference list for Tables S3

54. Tohge T, Nishiyama Y, Hirai MY, Yano M, Nakajima J, et al. (2005) Functional genomics by integrated analysis of metabolome and transcriptome of *Arabidopsis* plants over-expressing an MYB transcription factor. *Plant J* 42: 218-235.

55. Stephen J. Bloora, Sharon Abrahamsb (2002) The structure of the major anthocyanin in *Arabidopsis thaliana*. *Phytochemistry* 59: 343-346.
