# Supplementary material for: Chalcone-Synthase-Encoding RdCHS1 Is Involved in Flavonoid Biosynthesis in Rhododendron delavayi
Source: MDPI journal article supplement (doi:10.3390/molecules29081822), 2024-04-17
Supplement: s1 [file s1]

**Supplementary Table S1** List of primers used in this study

| <b>Primer name</b>             | <b>Primer sequence (5'→3')</b> |
|--------------------------------|--------------------------------|
| <i>RdCHS1</i> -gene cloning-F  | AAATGGCTCCTGGTGGTGTGTC         |
| <i>RdCHS1</i> -gene cloning- R | GCTGCCATTTCCAGTATCAAC          |
| <i>RdCHS1</i> -qRT-F           | TCAGTGGAGGAATTCCGAAAG          |
| <i>RdCHS1</i> - qRT-R          | TTAACGCAGTTAGCAGGAGTAG         |
| <i>Rd CHS1F</i> -32            | CGGGATCCATGGCTCCTGGTGGTGTG     |
| <i>Rd CHS1R</i> -32            | CCCAAGCTTTCAGTGAGCCGGAACGCT    |
| <i>Rd CHS1F</i> -121           | GCTCTAGAAATGGCTCCTGGTGGTGTG    |
| <i>Rd CHS1R</i> -121           | CGGGATCCTCAGTGAGCCGGAACGCT     |
| <i>NtCHS</i> -qRT-F            | TGACACCCACTTGGATAGTTTAG        |
| <i>NtCHS</i> -qRT-R            | CGACCTCTGGAATTGGATCAG          |
| <i>NtCHI</i> -qRT-F            | CTTTTCTCGCCGCTAAATG            |
| <i>NtCHI</i> -qRT-R            | TTTCTGCCACCTTCTCTG             |
| <i>NtF3'H</i> -qRT-F           | AGGCTCAACACTTCTCGT             |
| <i>NtF3'H</i> -qRT-R           | CATCAACTTTGGGCTTCT             |
| <i>NtF3'5'H</i> -qRT-F         | CGCACTACCATACTTAGGAGCCAT       |
| <i>NtF3'5'H</i> -qRT-R         | CAGCATCAGGAGTAGAAGCAACAG       |
| <i>NtDFR</i> -qRT-F            | AACCAACAGTCAGGGGAATG           |
| <i>NtDFR</i> -qRT-R            | TTGGACATCGACAGTTCCAG           |
| <i>NtANS</i> -qRT-F            | TGGCGTTGAAGCTCATACTG           |
| <i>NtANS</i> -qRT-R            | GGAATTAGGCACACACTTTGC          |
| <i>NtUFGT</i> -qRT-F           | GAGTGCATTGGATGCCTTTT           |
| <i>NtUFGT</i> -qRT-R           | CCAGCTCCATTAGGTCCCTTG          |
| <i>NtTubA1</i> -qRT-F          | CTCCTATGCTCCTGTTCATTTC         |
| <i>NtTubA1</i> -qRT-R          | GGCGAGGATCACACTTAAC            |
| <i>NtAN2</i> -qRT-F            | GAAGAAAGGTGCATGGACTG           |
| <i>NtAN2</i> -qRT-R            | TCTGCAGCTCTTTCTGCATC           |
| <i>NtAN1a</i> - qRT-F          | ACCATTCTCGAACCCGAAG            |
| <i>NtAN1a</i> - qRT-R          | TGCTAGGGCACAATGTGAAG           |
| <i>NtAN1b</i> - qRT-F          | CTTGAACACTTCTCAAACCGA          |
| <i>NtAN1b</i> - qRT-R          | TGCTAGGGCACAATGTGAAG           |
| <i>β-actin</i> -qRT-F          | GGCCGTGGTAGTGAACATATAA         |
| <i>β-actin</i> -qRT-R          | GTATGCCCTTCCTCATGCTATC         |
| <i>NtTubA1</i> -qRT-F          | CTCCTATGCTCCTGTTCATTTC         |
| <i>NtTubA1</i> -qRT-R          | GGCGAGGATCACACTTAAC            |
| <i>Rdactin1</i> -qRT-F         | GTATGCCCTTCCTCATGCTATC         |
| <i>Rdactin1</i> -qRT-R         | GGCCGTGGTAGTGAACATATAA         |
| <i>RdCHS2</i> -gene cloning-F  | AAAATCCCAGTATGTGCGAGTA         |
| <i>RdCHS2</i> -gene cloning- R | CGTATGAGCGTCCACGAAGT           |
| <i>RdCHS3</i> -gene cloning-F  | ATGGTCAGGATAGAGGATGTTC         |
| <i>RdCHS3</i> -gene cloning- R | TCCACATGAGCGTCCACGAA           |

\* Restriction enzyme site are underlined
