# Supplementary material for: Chalcone-Synthase-Encoding RdCHS1 Is Involved in Flavonoid Biosynthesis in Rhododendron delavayi
Source: MDPI journal article supplement (doi:10.3390/molecules29081822), 2024-04-17
Supplement: s1 [file s1]

**Table S4 HPLC-ESI-MS analysis of anthocyanin extracts of *RdCHS1* over-expressing transgenic tobacco flowers**

| <b>Peak<br/>number</b> | <b>Identifacation/tentative<br/>identification</b>               | <b>Retention<br/>time (min)</b> | <b>ESI-MS (m/z)</b>          |
|------------------------|------------------------------------------------------------------|---------------------------------|------------------------------|
| <b>1</b>               | <b>Cyanidin 3-<i>O</i>-rutinoside</b>                            | <b>34.51</b>                    | <b>287.1</b><br><b>595.2</b> |
| <b>2</b>               | <b>Cyanidin 3-<i>O</i>-(6-<i>O</i>-malonyl-beta-D-glucoside)</b> | <b>40.23</b>                    | <b>287.1</b><br><b>535.1</b> |
