# Supplementary material for: Chalcone-Synthase-Encoding RdCHS1 Is Involved in Flavonoid Biosynthesis in Rhododendron delavayi
Source: MDPI journal article supplement (doi:10.3390/molecules29081822), 2024-04-17
Supplement: s1 [file s1]

Table S2 The anthocyanin profiles in acidic MeOH-H<sub>2</sub>O extracts of the *RdCHS1* transgenic *Arabidopsis*

| Seedling        | Cyanidin            | Pelargonidin        |
|-----------------|---------------------|---------------------|
| Wild Type       | 177.06 <sup>a</sup> | 95.19 <sup>a</sup>  |
| Mutant          | N/D                 | N/D                 |
| <i>RdCHS1-1</i> | 121.69 <sup>b</sup> | 154.55 <sup>b</sup> |
| <i>RdCHS1-3</i> | 138.02 <sup>b</sup> | 144.93 <sup>b</sup> |
