# Supplementary figures and images for: Chalcone-Synthase-Encoding RdCHS1 Is Involved in Flavonoid Biosynthesis in Rhododendron delavayi
Source: MDPI journal article supplement (doi:10.3390/molecules29081822), 2024-04-17

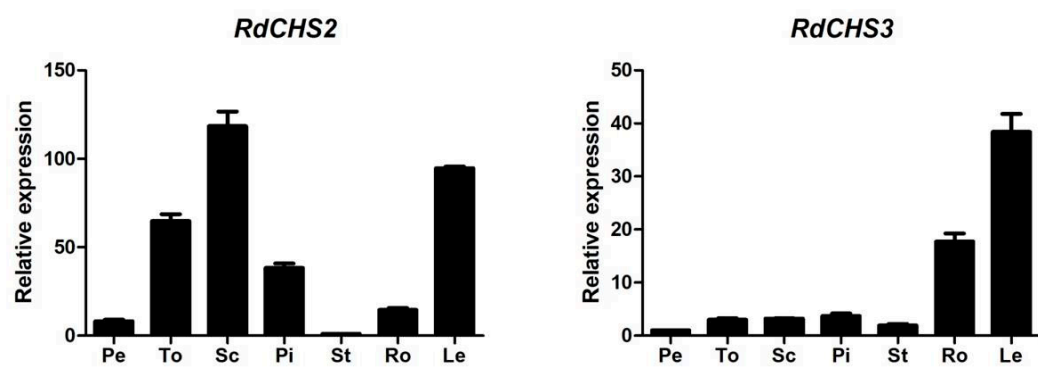

Figure S1 Expression analysis of *RdCHS2* and *RdCHS3*

Supplement: s1 [file s1]
